# Supplementary material for: Comparative Analysis of B-Cell Receptor Repertoires Induced by Live Yellow Fever Vaccine in Young and Middle-Age Donors
Source: PubMed Central journal article supplement (PMC6189279; doi:10.3389/fimmu.2018.02309), 2018-10-09
Supplement: Image_1.pdf [file Image_1.pdf]

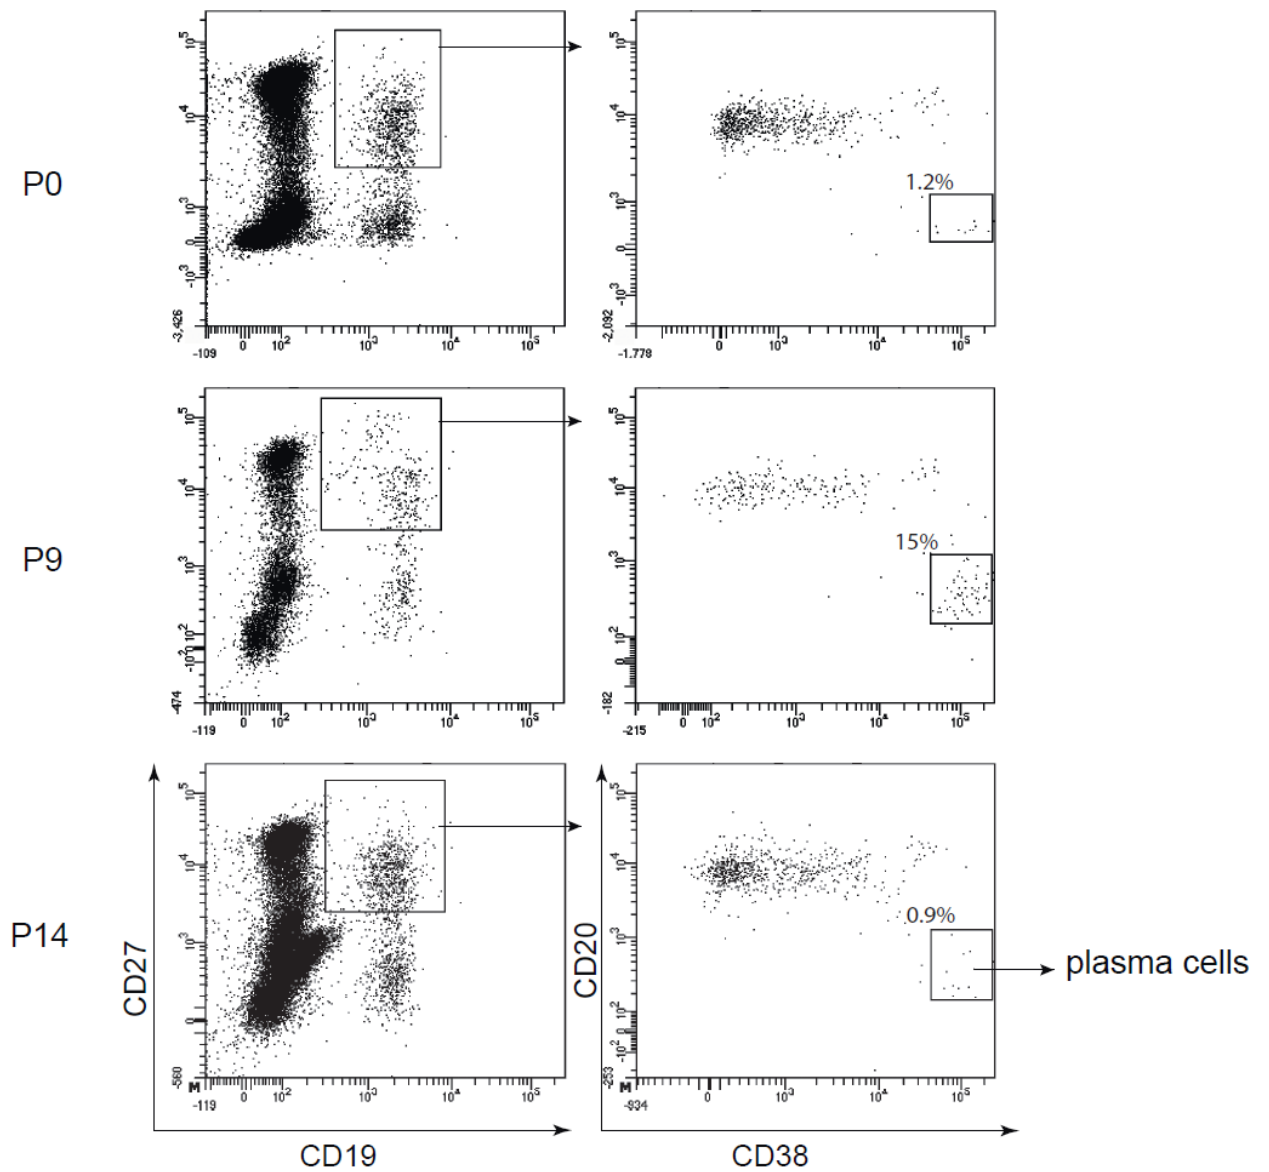

**Supplementary Figure 1.** Typical flow cytometry plots showing relative abundance of CD20-CD19+CD27<sup>high</sup>CD38<sup>high</sup> plasma B cells in peripheral blood at the day of vaccination and at time points 9 days and 14 days after vaccination.
